# Supplementary material
Source: PubMed Central journal article supplement (PMC4113504)
Supplement: NIHMS4505-supplement-supp_data.pdf [file NIHMS4505-supplement-supp_data.pdf]

**Supplementary Table 1**

Primers used for mutagenesis of DGAT1 (modifications are underlined)

|              | Forward                                                                | Reverse                                                              |
|--------------|------------------------------------------------------------------------|----------------------------------------------------------------------|
| FL-DGAT1-HA  | 5- <u>GGTTACCCATACGACGTCCCAGACTACGCTTGAGCTACTGCCAAAGGCCAGCCCTCC</u> -3 | 5- <u>AGCGTAGTCTGGGACGTCGTATGGGTAACCGACCCCACTGGGGCATCGTAGTT</u> -3   |
| FL-DGAT1-Myc | 5- <u>GGTGAACAGAACTGATCAGCGAAGAGGATCTGTGAGCTACTGCCAAAGGCC</u> AGC-3    | 5- <u>CAGATCTTCTTCAGAAATAAGTTTTTGTTCAGCTGGATGGGAAAGTAGTCT</u> CG-3   |
| 129HA        | 5- <u>TACCCATACGACGTCCCAGACTACGCTGTGTCTCTGTTTTGAAGGACCC</u> -3         | 5- <u>AGCGTAGTCTGGGACGTCGTATGGGTA</u> CACCTGGATAGGATCCACCAG-3        |
| 165Myc       | 5- <u>GAACAAAACTGATATCTGAAGAAGATCTGGCCCTGACAGAGCAGATGGG</u> -3         | 5- <u>CAGATCTTCTTCAGATATCAGTTTTTGTTC</u> ACTGCCAGGCGTTCTCAATCTG-3    |
| 196HA        | 5- <u>TACCCATACGACGTCCCAGACTACGCTTCTATCACTCCAGTGGGTCCCGTG</u> -3       | 5- <u>AGCGTAGTCTGGGACGTCGTATGGGTA</u> CTCAACCAGTAAGGCCACAGCTG-3      |
| 230HA        | 5- <u>TACCCATACGACGTCCCAGACTACGCTAGGGTCAAGGCCAAAGCTGTCTC</u> -3        | 5- <u>AGCGTAGTCTGGGACGTCGTATGGGTA</u> TCGCTGGCGGCACCACAGGTTG-3       |
| 240HA        | 5- <u>TACCCATACGACGTCCCAGACTACGCTAAGAAGGTCAGTGGGGCTGCTG</u> -3         | 5- <u>AGCGTAGTCTGGGACGTCGTATGGGTA</u> CCCTGTAGAGACAGCTTTGGC-3        |
| 250HA        | 5- <u>TACCCATACGACGTCCCAGACTACGCTGCTGTGAGCTATCCAGACAACCTG</u> -3       | 5- <u>AGCGTAGTCTGGGACGTCGTATGGGTA</u> TTGCTGGGCAGCAGCCCACTG-3        |
| 337Myc       | 5- <u>GAACAAAACTGATATCTGAAGAAGATCTGGCGGTCCCCAACCATCTGATCTG</u> -3      | 5- <u>CAGATCTTCTTCAGATATCAGTTTTTGTTC</u> CAGCTTTAAGAGACGCTCAATATCC-3 |
| 387Myc       | 5- <u>GAACAAAACTGATATCTGAAGAAGATCTGTGGAATATCCCCGTGCACAAGTG</u> -3      | 5- <u>CAGATCTTCTTCAGATATCAGTTTTTGTTC</u> GTTCTGCCAAAAGTAGGTGACAGA-3  |
| 436Myc       | 5- <u>GAACAAAACTGATATCTGAAGAAGATCTGTTCCGCTCTGGGCATTACAGCC</u> -3       | 5- <u>CAGATCTTCTTCAGATATCAGTTTTTGTTC</u> CATCCGCAGGGGAACGCTCACTAG-3  |
| 460Myc       | 5- <u>GAACAAAACTGATATCTGAAGAAGATCTGGGGA</u> ACTATGGCAATGCAGCTGT-3      | 5- <u>CAGATCTTCTTCAGATATCAGTTTTTGTTC</u> TGGAAGAATCGGCCACAATCCAG-3   |
| H426A        | 5-TGACCTCAGCCTTCTTCGCTGAGTACCTAGTGAGCG-3                               | 5-CGCTCACTAGGTA <sup>u</sup> CTCAGCGAAGAAGGCTGAGGTCA-3               |
